# Supplementary material for: Molecularly imprinted polymer-coated silica microbeads for high-performance liquid chromatography
Source: Royal Society of Chemistry journal article supplement (doi:10.1039/d4an00239c), 2024-01-01
Supplement: d4an00239c1.pdf [file d4an00239c1.pdf]

## Supplementary Material

### **Molecularly imprinted polymer coated silica microbeads for high performance liquid chromatography**

Wenpu Wu,<sup>a</sup> Cuichi Yu,<sup>a</sup> Lei Sui,<sup>a</sup> Hui Xu,<sup>\*a</sup> Jinhua Li,<sup>b</sup> Na Zhou,<sup>b</sup> Lingxin Chen,<sup>\*b,c</sup>,  
Zhihua Song,<sup>\*a</sup>

*a School of Pharmacy, Collaborative Innovation Center of Advanced Drug Delivery System and Biotech Drugs in Universities of Shandong, Key Laboratory of Molecular Pharmacology and Drug Evaluation (Yantai University), Ministry of Education, Yantai University, Yantai, 264005, P. R. China*

*b CAS Key Laboratory of Coastal Environmental Processes and Ecological Remediation, Research Center for Coastal Environmental Engineering and Technology, Yantai Institute of Coastal Zone Research, Chinese Academy of Sciences, Yantai 264003, P. R. China*

*c School of Pharmacy, Binzhou Medical University, Yantai, 264003, China*

\* Corresponding author.

Phone/Fax: +86-535-6706 066

E-mail addresses: xuhui33@sina.com, lxchen@yic.ac.cn (L. Chen),  
zihuasong08@yeah.net (Z. Song)



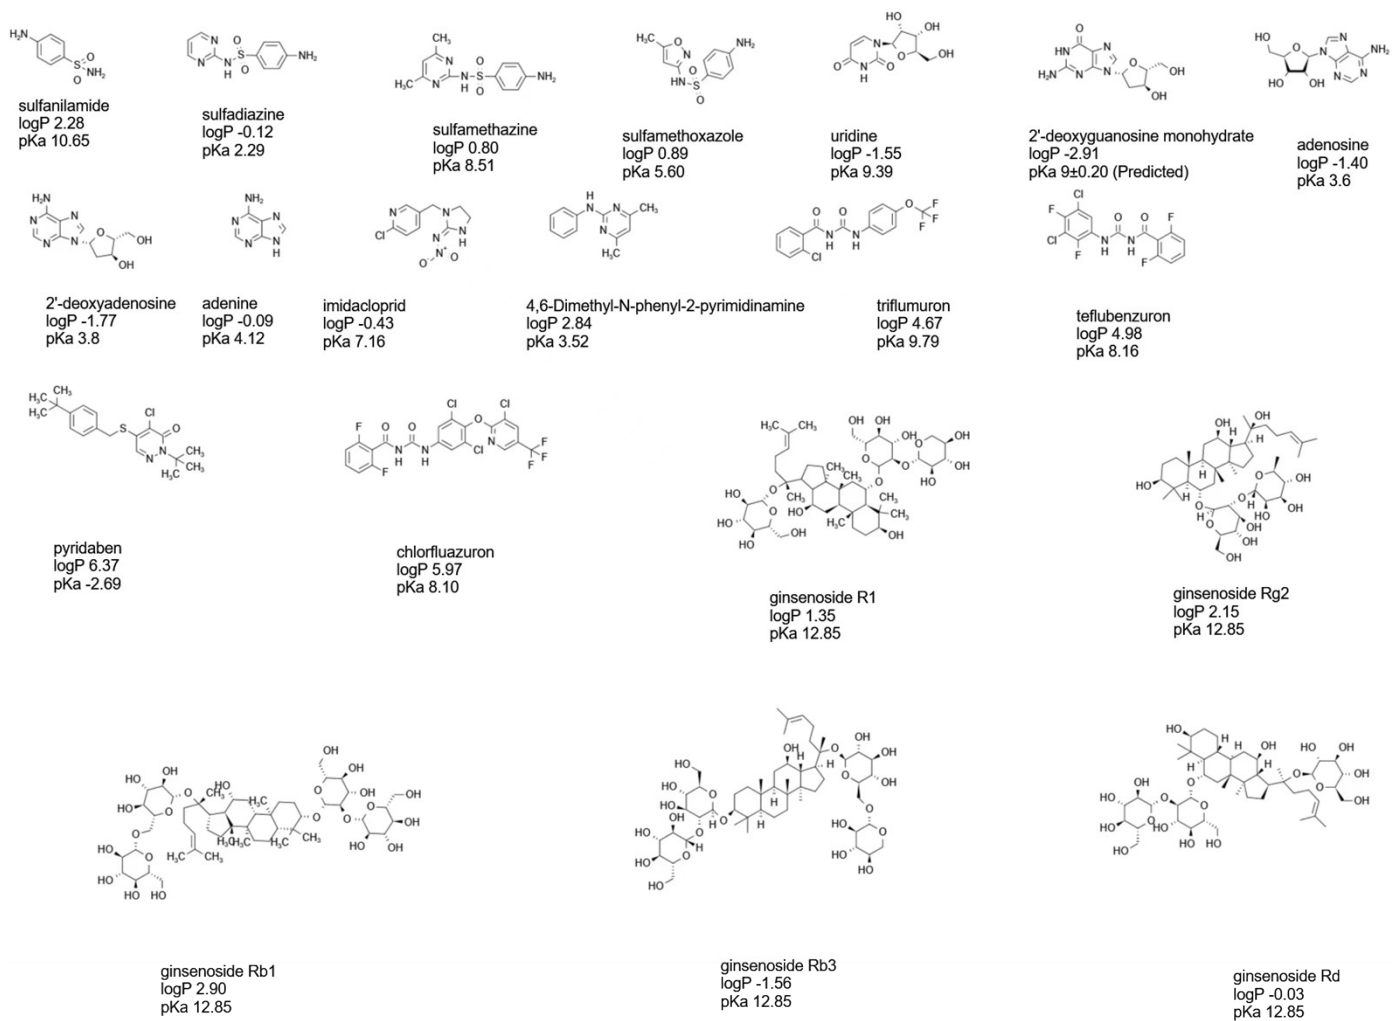

**Figure S1** Chemical structures of the analytes measured in this work.

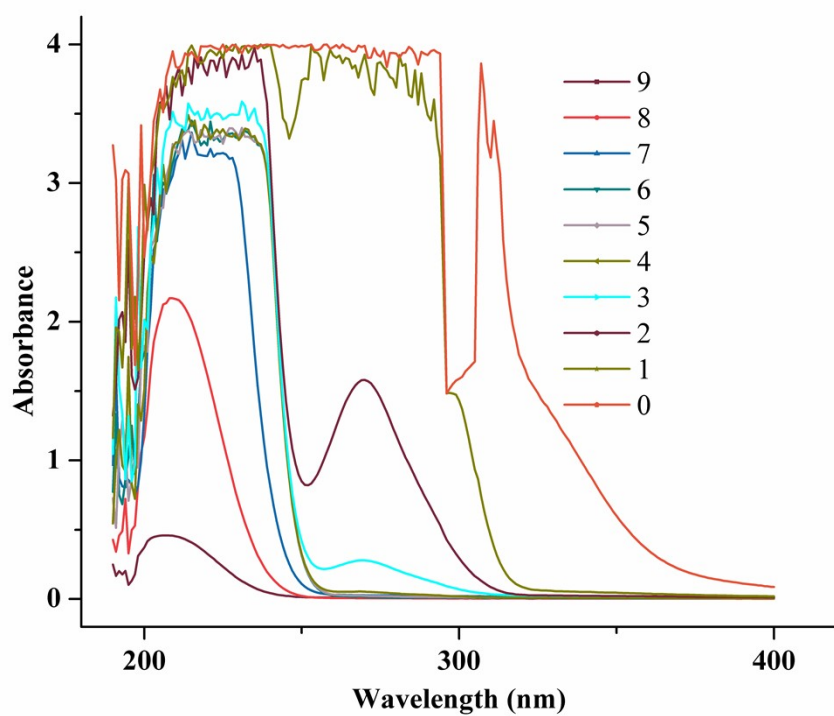

**Figure S2** The ultra-violet absorption spectra of the solutions (including the reaction solution (namely 0 times), the MeOH-HAC solutions after elution the materials 1-6 times, and ethanol after elution the materials 3 times (namely 7-9 times)).

### The procedure for synthesis of C18/SiO<sub>2</sub> stationary phase.

Firstly, bare silica (particle size, 5  $\mu\text{m}$ ; pore size, 30 nm) was activated by 15% (wt.%) dilute nitric acid aqueous solution under quick stirring at room temperature. 1.5 h later, the materials were washed to neutral by deionized water, the materials were collected and dried. Secondly, C18 was modified on the silica: 2 g activated bare silica microbeads, 47 mL anhydrous toluene, 2 mL of octadecyltrichlorosilane were mixed and refluxed under 110°C for 24 h. The resulting materials were eluted with toluene and ethyl alcohol, and dried. Thirdly, end-capping: the material from the second step, 2 mL of trimethyl chlorosilane and 47 mL of anhydrous toluene were mixed and refluxed in oil bath under 110°C for 24 h.

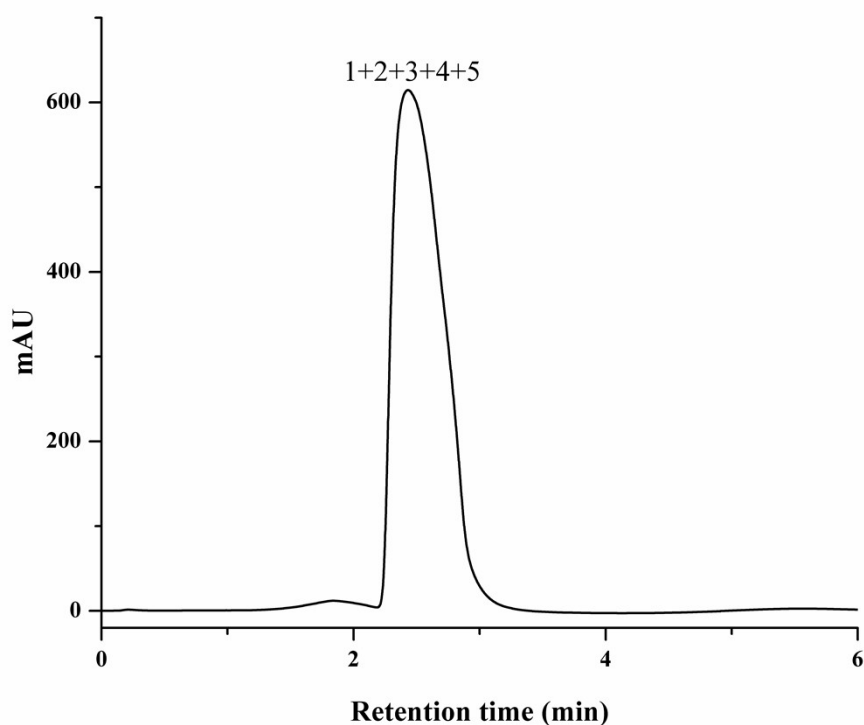

**Figure S3** Chromatogram of ginsenosides on the Amino-SiO<sub>2</sub> column. Chromatographic conditions: 30% ACN-70% $\text{H}_2\text{O}$  (v:v). Flow rate: 0.2 mL/min, detection wavelength: 203 nm, injection volume: 5  $\mu\text{L}$ . Peak: 1. ginsenoside R1, 2. ginsenoside Rg2, 3. ginsenoside Rb1, 4. ginsenoside Rb3, 5. ginsenoside Rd.

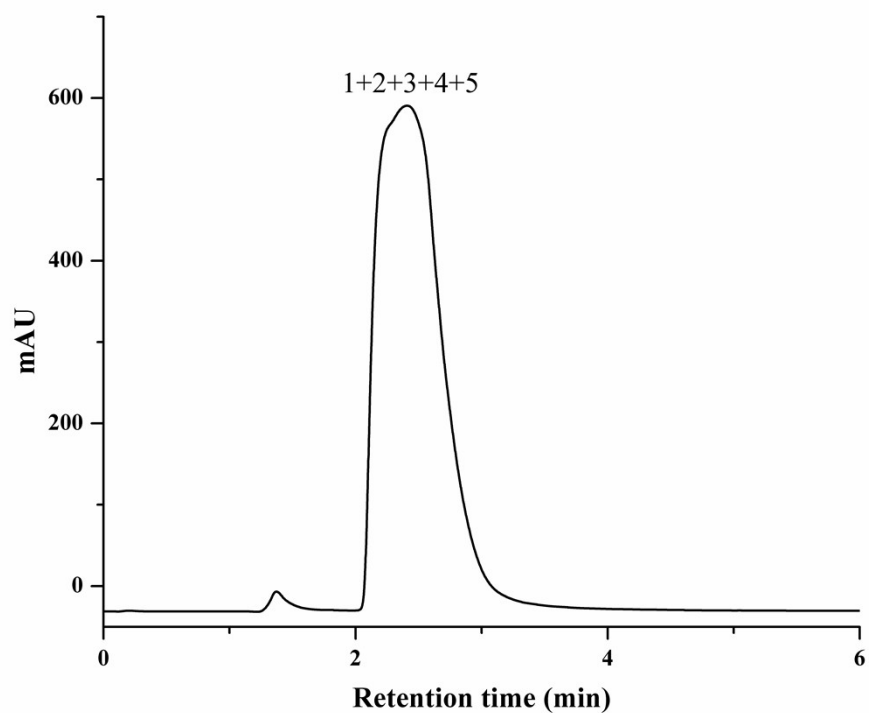

**Figure S4** Chromatogram of ginsenosides on a Diol-SiO<sub>2</sub> column. Chromatographic conditions: 30% ACN-70% $\text{H}_2\text{O}$  (v:v). Flow rate: 0.2 mL/min, detection wavelength: 203 nm, injection volume: 5  $\mu\text{L}$ . Peak: 1. ginsenoside R1, 2. ginsenoside Rg2, 3. ginsenoside Rb1, 4. ginsenoside Rb3, 5. ginsenoside Rd.

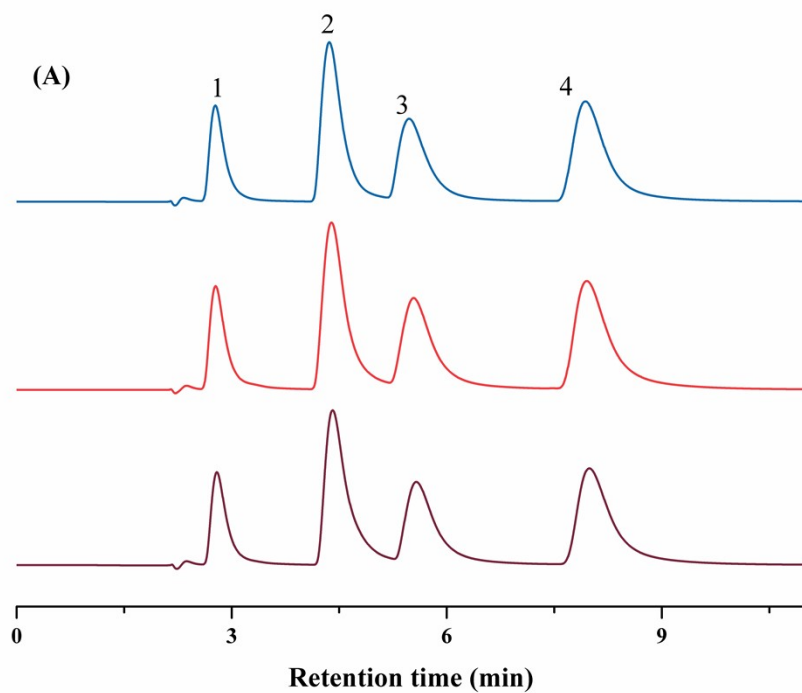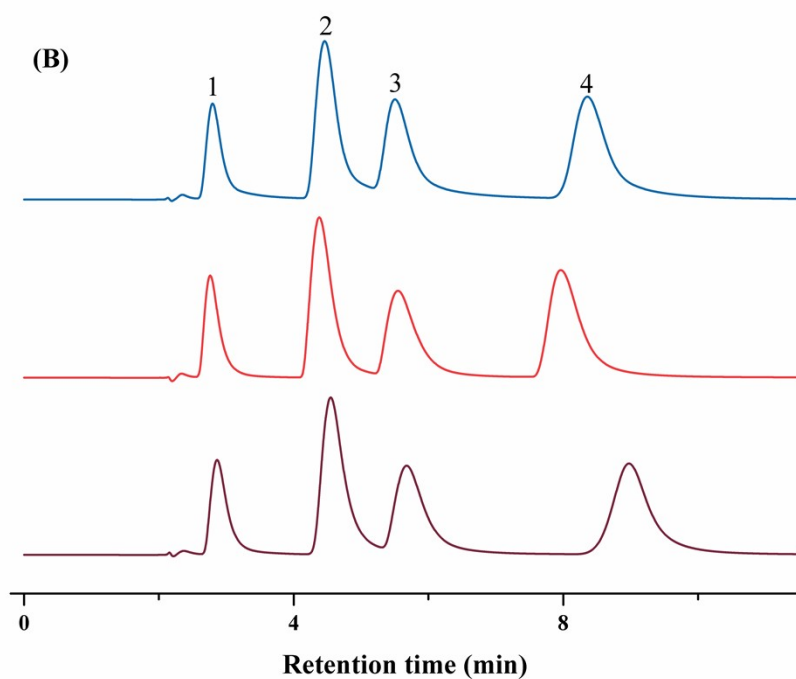

**Figure S5** Chromatographic separation of mixture of sulfonamides: 1. SM, 2. SDZ, 3. SMZ, 4. SMO. Column (2.1 mm × 150 mm) packed with the same batch of MIP/SiO<sub>2</sub> SP (A) and three different batches of MIP/SiO<sub>2</sub> SP (B). Chromatographic conditions: 0.5% MeOH-99.5% H<sub>2</sub>O (v:v), Flow rate: 0.2 mL/min, detection wavelength: 270 nm, injection volume: 5

$\mu\text{L}$ .



**Table S1.** Pore structure and carbon content of the materials.

| materials                       | Particles SBET <sup>a</sup><br>(m <sup>2</sup> g <sup>-1</sup> ) | Pore size <sup>b</sup><br>(nm) | Pore volume <sup>c</sup><br>(cm <sup>3</sup> g <sup>-1</sup> ) | Carbon content<br>(wt.%) |
|---------------------------------|------------------------------------------------------------------|--------------------------------|----------------------------------------------------------------|--------------------------|
| bare silica                     | 111.7                                                            | 31.7                           | 0.7                                                            | 0.4                      |
| double bond-<br>modified-silica | 92.9                                                             | 27.1                           | 0.7                                                            | 4.0                      |
| MIP/SiO <sub>2</sub>            | 97.9                                                             | 26.2                           | 0.7                                                            | 3.7                      |
| NIP/SiO <sub>2</sub>            | 94.1                                                             | 22.8                           | 0.6                                                            | 5.2                      |

a BET surface area.

b BJH adsorption average pore size.

c BJH adsorption cumulative volume of pores between 8.500 Å and 1,500.000 Å radius.

**Table S2** Chromatographic data of sulfonamides on the stationary phases.

| Analytes         | MIP/SiO <sub>2</sub> SP |                |      | NIP/SiO <sub>2</sub> SP |                |      | C18/SiO <sub>2</sub> SP |                |      |
|------------------|-------------------------|----------------|------|-------------------------|----------------|------|-------------------------|----------------|------|
|                  | N/m                     | T <sub>f</sub> | Rs   | N/m                     | T <sub>f</sub> | Rs   | N/m                     | T <sub>f</sub> | Rs   |
| sulfanilamide    | 6000                    | 1.66           | -    | 4570                    | 2.08           | -    | 8270                    | 2.00           | -    |
| sulfadiazine     | 8650                    | 1.49           | 3.96 | 5660                    | 2.60           | 3.90 | 4850                    | 2.04           | 1.40 |
| sulfamethazine   | 8840                    | 1.63           | 1.93 | 4940                    | 3.14           | 1.60 | 10250                   | 1.98           | 2.43 |
| sulfamethoxazole | 13510                   | 1.29           | 4.34 | 4930                    | 4.06           | 4.23 | 10080                   | 1.30           | 2.76 |

**Table S3** Chromatographic data of ginsenosides on the stationary phases. Mobile phase: MeOH/H<sub>2</sub>O, 4:6 (v/v), 0.2 mL/min.

| Analytes        | MIP/SiO <sub>2</sub> SP<br>N/m | T <sub>f</sub> | R <sub>s</sub> |
|-----------------|--------------------------------|----------------|----------------|
| ginsenoside R1  | 2690                           | 2.17           | -              |
| ginsenoside Rg2 | 4650                           | 1.66           | 4.09           |
| ginsenoside Rb1 | 10420                          | 1.30           | 2.84           |
| ginsenoside Rb3 | 9850                           | 0.97           | 2.45           |
| ginsenoside Rd  | 11600                          | 1.04           | 1.51           |

**Table S4** Chromatographic data of nucleosides on the stationary phases. Mobile phase: MeOH/H<sub>2</sub>O, 1:99 (v/v), 0.2 mL/min.

| Analytes                      | MIP/SiO <sub>2</sub> SP<br>N/m | T <sub>f</sub> | R <sub>s</sub> |
|-------------------------------|--------------------------------|----------------|----------------|
| uridine                       | 5470                           | 2.13           | -              |
| 2'-deoxyguanosine monohydrate | 6950                           | 1.77           | 1.62           |
| adenosine                     | 8810                           | 1.93           | 2.29           |
| 2'-deoxyadenosine             | 10510                          | 1.94           | 1.92           |
| adenine                       | 9620                           | 1.91           | 1.96           |

**Table S5** Chromatographic data of pesticides on the stationary phases. Mobile phase: MeOH/H<sub>2</sub>O, 45:55 (v/v), 0.2 mL/min.

| Analytes                                   | MIP/SiO <sub>2</sub> SP<br>N/m | T <sub>f</sub> | R <sub>s</sub> |
|--------------------------------------------|--------------------------------|----------------|----------------|
| imidacloprid                               | 2450                           | 1.10           | -              |
| 4,6-Dimethyl-N-phenyl-2-<br>pyrimidinamine | 3550                           | 0.99           | 2.19           |
| triflumuron                                | 4320                           | 0.84           | 2.07           |
| teflubenzuron                              | 6850                           | 0.95           | 2.79           |
| pyridaben                                  | 7260                           | 1.12           | 2.12           |
| chlorfluazuron                             | 6070                           | 1.36           | 4.23           |
